# Supplementary material for: Rift Valley Fever, Sudan, 2007 and 2010
Source: PubMed Central journal article supplement (PMC3559046; doi:10.3201/eid1902.120834), 2013-02
Supplement: 12-0834-Techapp-s1.pdf [file 12-0834-Techapp-s1.pdf]

# Rift Valley Fever, Sudan, 2007 and 2010

## Technical Appendix

### Supplemental References

41. Dia I, Ba H, Mohamed SAO, Diallo D, Lo B, Diallo M. Distribution, host preference and infection rates of malaria vectors in Mauritania. *Parasit Vectors*. 2009;2:61. [PubMed](#)  
<http://dx.doi.org/10.1186/1756-3305-2-61>
42. Muturi EJ, Shililu J, Jacob B, Gu W, Githure J, Novak R. Mosquito species diversity and abundance in relation to land use in a Riceland agroecosystem in Mwea, Kenya. *J Vector Ecol*. 2006;31:129–37. [PubMed](#) [http://dx.doi.org/10.3376/1081-1710\(2006\)31\[129:MSDAAI\]2.0.CO;2](http://dx.doi.org/10.3376/1081-1710(2006)31[129:MSDAAI]2.0.CO;2)
43. Muturi EJ, Shililu JI, Gu W, Jacob BG, Githure JI, Novak RJ. Larval habitat dynamics and diversity of *Culex* mosquitoes in rice agro-ecosystem in Mwea, Kenya. *Am J Trop Med Hyg*. 2007;76:95–102. [PubMed](#)
44. Schäfer ML, Lundström JO. Different responses of two floodwater mosquito species, *Aedes vexans* and *Ochlerotatus sticticus* (Diptera: Culicidae), to larval habitat drying. *J Vector Ecol*. 2006;31:123–8. [PubMed](#) [http://dx.doi.org/10.3376/1081-1710\(2006\)31\[123:DROTFM\]2.0.CO;2](http://dx.doi.org/10.3376/1081-1710(2006)31[123:DROTFM]2.0.CO;2)
45. Thonnon J, Picquet M, Thiongane Y, Lo M, Sylla R, Vercruyse J. Rift Valley fever surveillance in the lower Senegal River basin: update 10 years after the epidemic. *Trop Med Int Health*. 1999;4:580–5. [PubMed](#) <http://dx.doi.org/10.1046/j.1365-3156.1999.00437.x>
46. Woods CW, Karpati AM, Grein T, McCarthy N, Gaturuku P, Muchiri E, et al. An outbreak of Rift Valley fever in northeastern Kenya, 1997–98. *Emerg Infect Dis*. 2002;8:138–44. [PubMed](#)  
<http://dx.doi.org/10.3201/eid0802.010023>

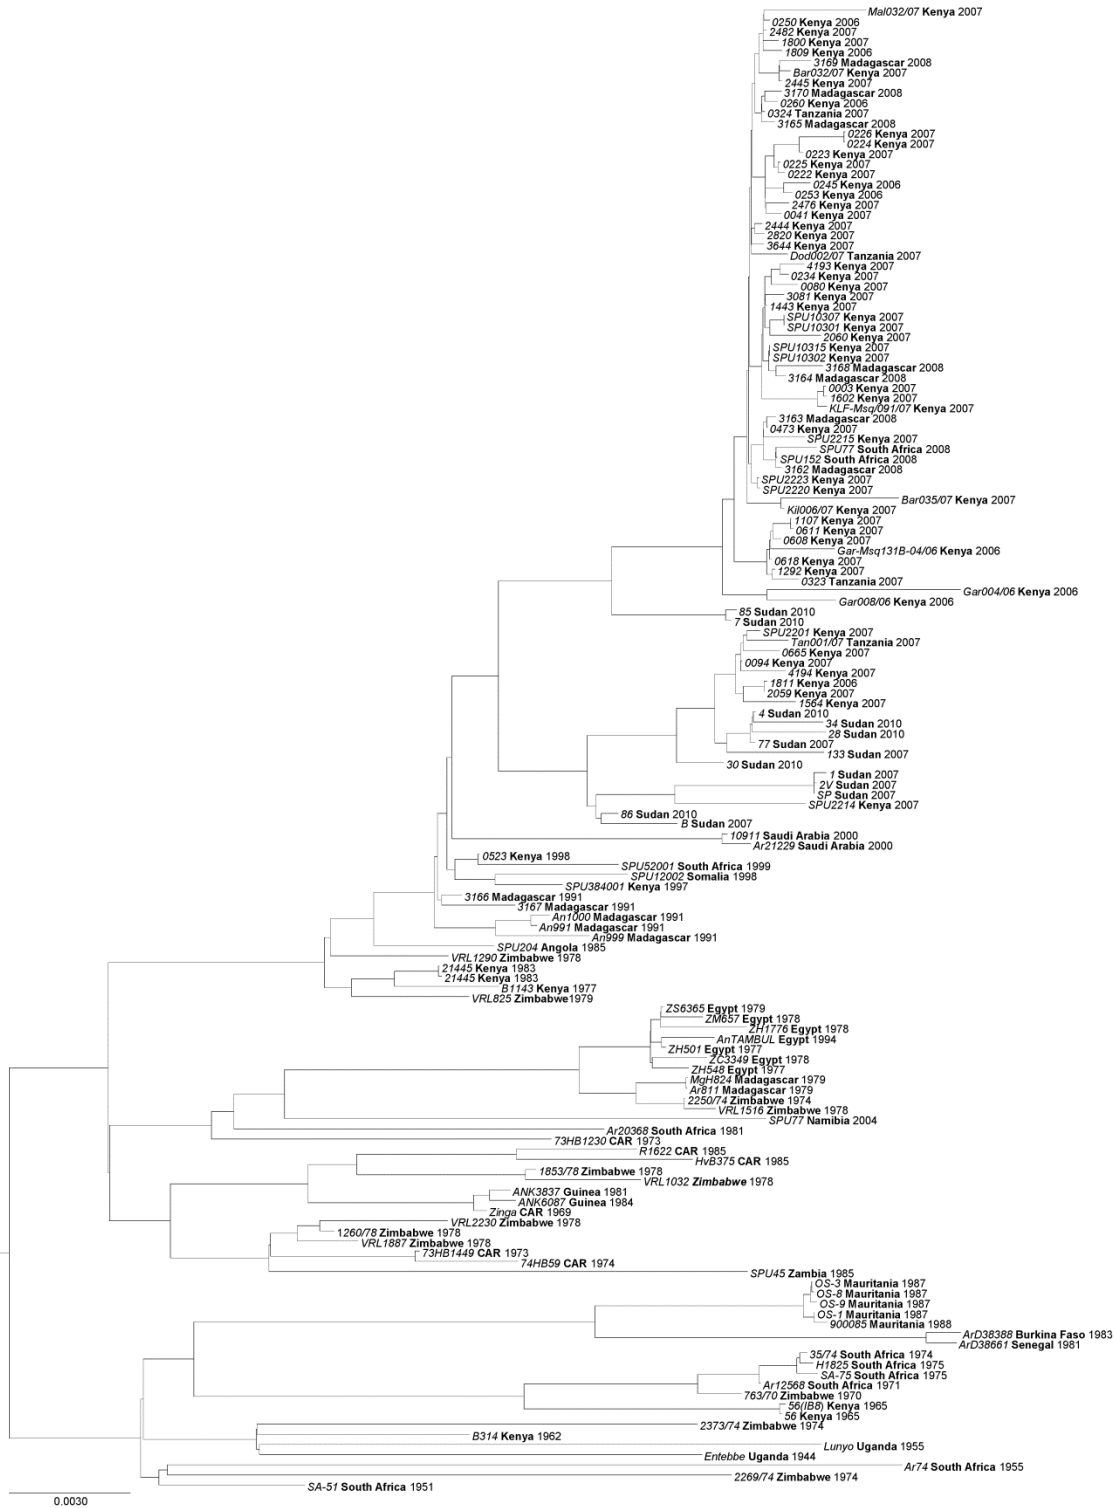

Technical Appendix Figure 1. Phylogenetic analysis of complete Rift Valley fever virus S (small) segment sequences represented as a maximum clade credibility tree. Scale bar represents substitutions per site per year.

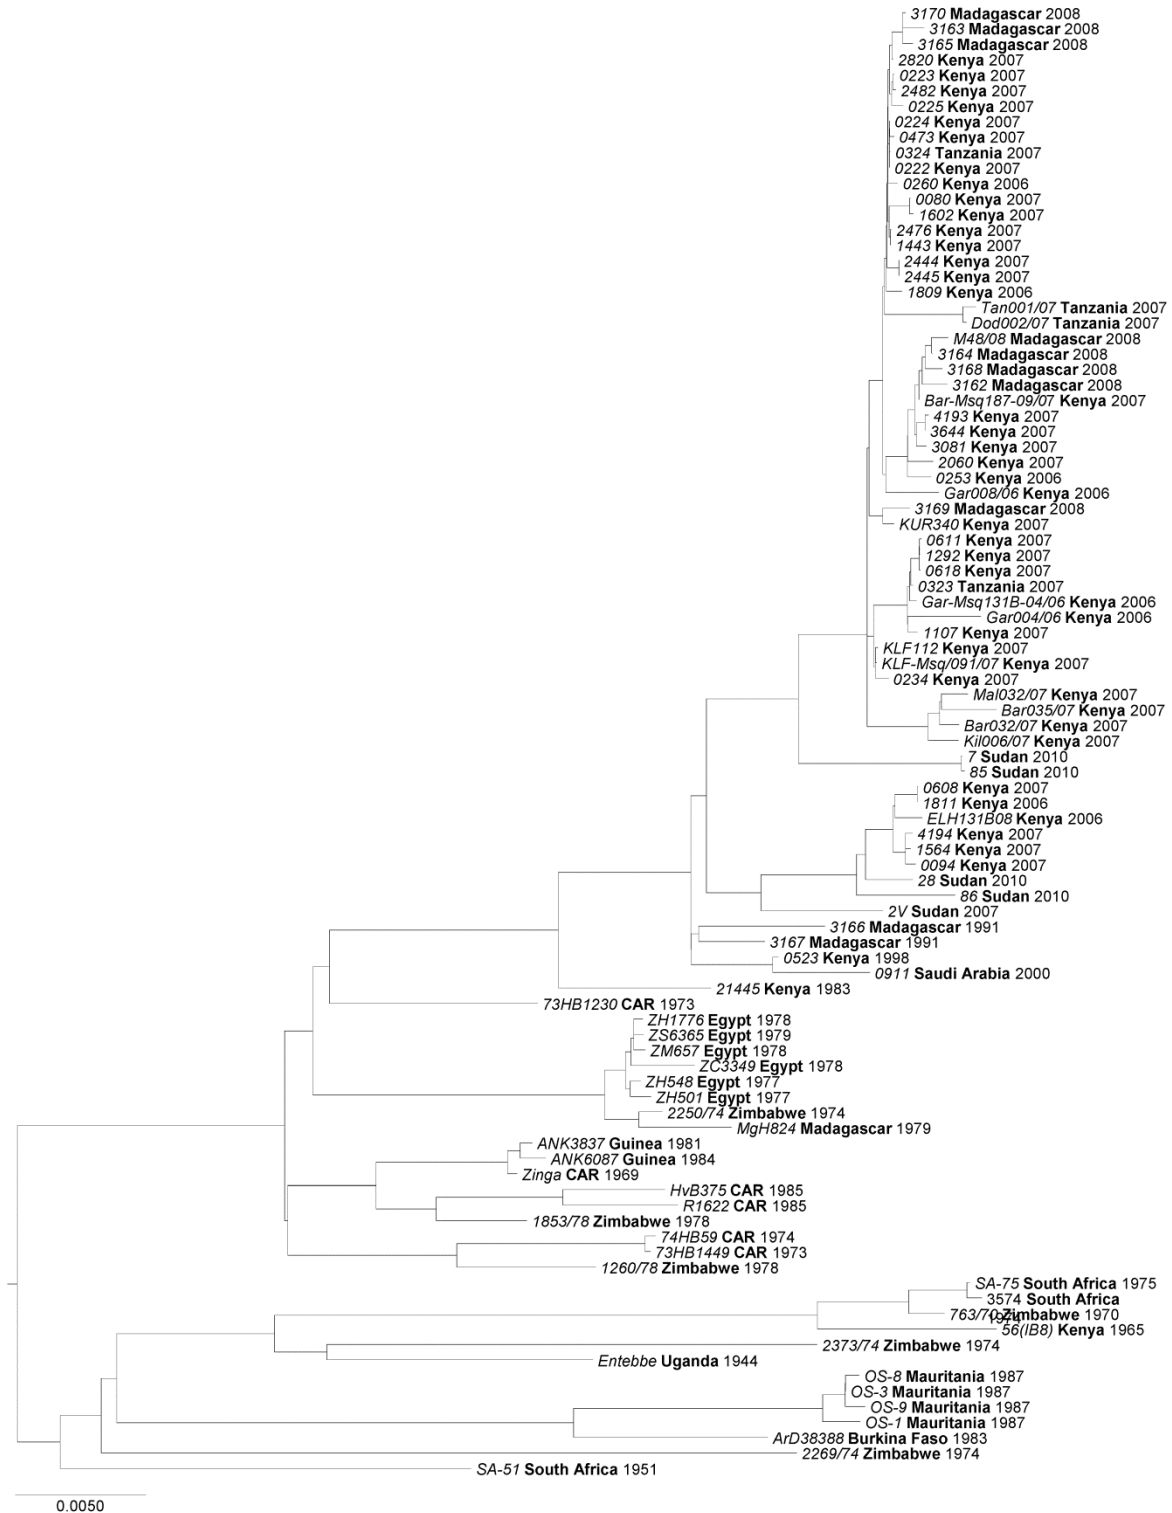

Technical Appendix Figure 2. Phylogenetic analysis of complete Rift Valley fever virus M (medium) segment sequences represented as a maximum clade credibility tree. Scale bar represents substitutions per site per year.

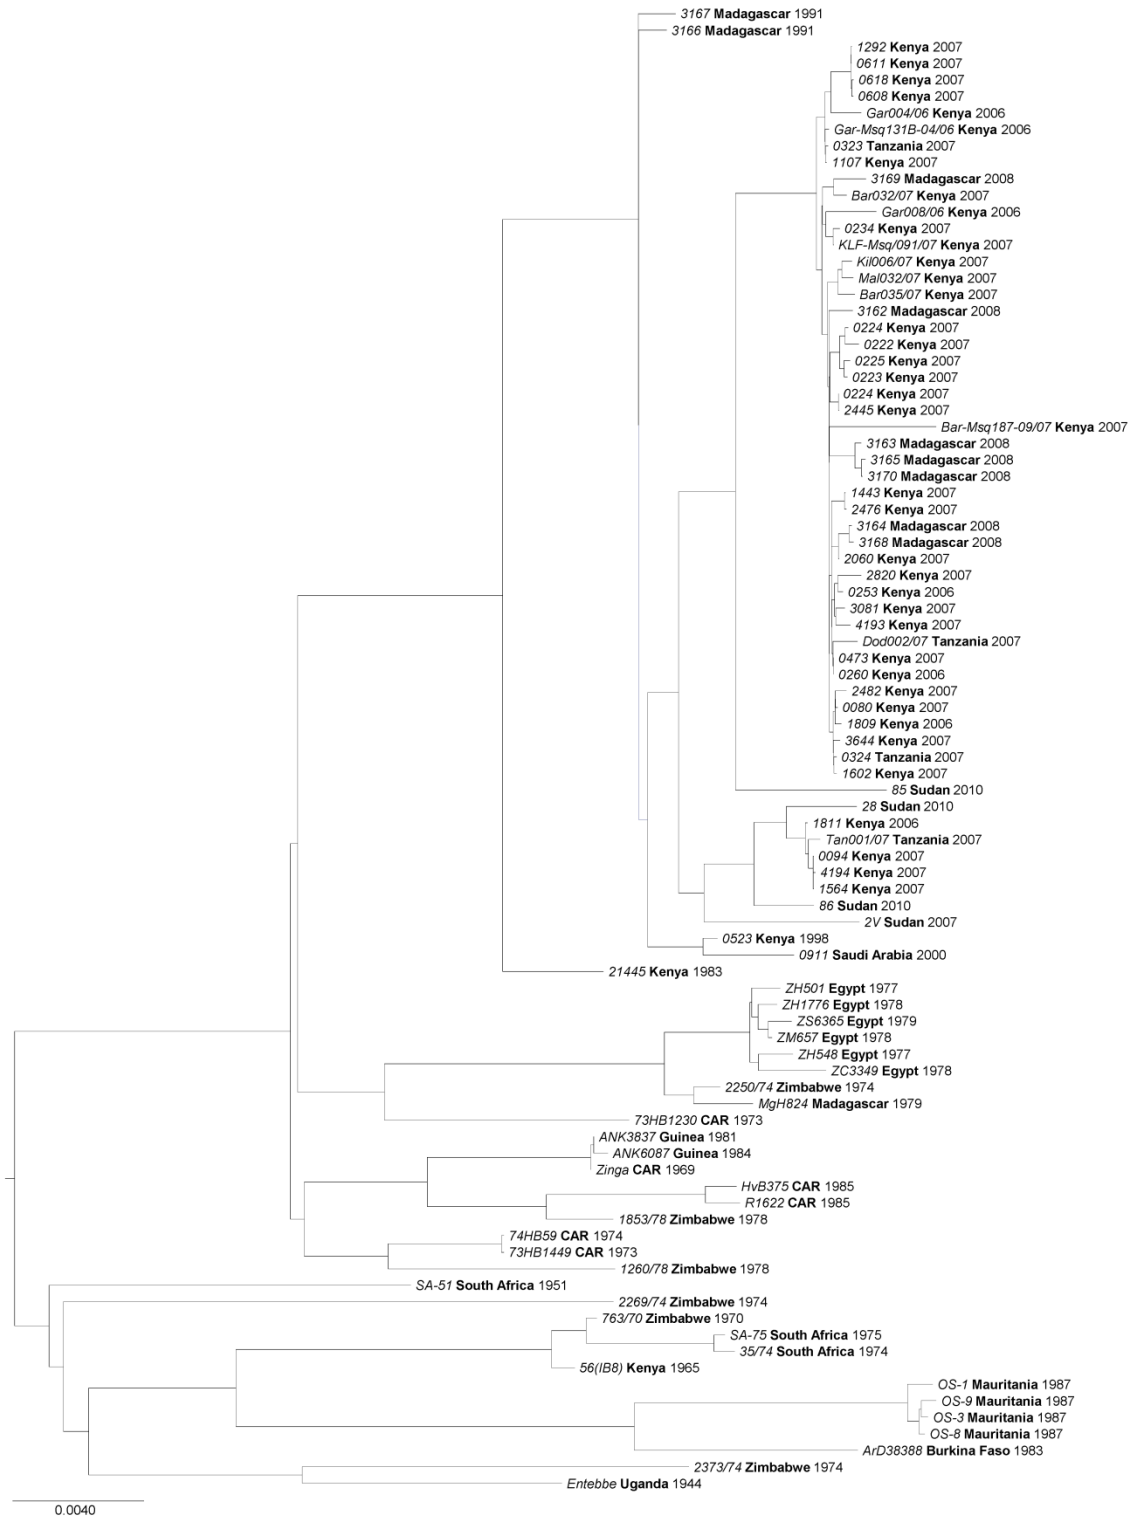

Technical Appendix Figure 3. Phylogenetic analysis of complete Rift Valley fever virus L (large) segment sequences represented as a maximum clade credibility tree. Scale bar represents substitutions per site per year.
